# Supplementary material
Source: PubMed Central journal article supplement (PMC1746915)
Supplement: thorax_59_12_1026__1.pdf [file thorax_59_12_1026__1.pdf]

## WEB-ONLY DATA SUPPLEMENT

### Oxygen uptake kinetics during continuous exercise

In addition to the continuous exercise (CE) and intermittent exercise (IE) bouts, seven subjects performed 1 or 2 additional constant-load transitions to 70% of peak power. The protocol for these additional exercise bouts involved 3 min of unloaded cycling followed by an abrupt application of the predetermined workload for 7 min. The breath-by-breath oxygen uptake ( $\dot{V}_{O_2}$ ) data from each trial (including the first 7 min of the CE bout) were inspected for aberrant breaths. Values exceeding 3 standard deviations from the local mean were removed. The  $\dot{V}_{O_2}$  data from the repeated trials were then interpolated to 1 second values, time aligned and averaged, effectively smoothing the data and enhancing the underlying kinetic response. A four-compartment model with three exponential terms was used to describe the time course of the  $\dot{V}_{O_2}$  response (Equation 1):

$$\dot{V}_{O_2}(t) = A_B + A_C(1 - e^{-(t-TD_C)/\tau_C}) + A_P(1 - e^{-(t-TD_P)/\tau_P}) + A_S(1 - e^{-(t-TD_S)/\tau_S}),$$

where  $\dot{V}_{O_2}(t)$  is the  $\dot{V}_{O_2}$  at time  $t$ ;  $A_B$  is the baseline  $\dot{V}_{O_2}$  during unloaded cycling, while  $A_C$ ,  $A_P$  and  $A_S$  represent the cardio-dynamic (phase I), primary (phase II) and slow component amplitudes, respectively;  $TD_C$ ,  $TD_P$  and  $TD_S$ , and  $\tau_C$ ,  $\tau_P$  and  $\tau_S$  are the time delays and time constants of phase I and the primary and slow components, respectively.

If the amplitude of the slow component ( $A_S$ ) was not significantly different from 0, the model was reduced to three compartments with exponential terms describing phase I and phase II (Equation 2):

$$\dot{V}_{O_2}(t) = A_B + A_C(1 - e^{-(t-TD_C)/\tau_C}) + A_S(1 - e^{-(t-TD_S)/\tau_S})$$

Figure 1 shows an example of the  $\dot{V}_{O_2}$  response and model fit in a representative subject with chronic obstructive pulmonary disease (COPD) and Table 1 provides the individual and group mean values for selected model parameters.

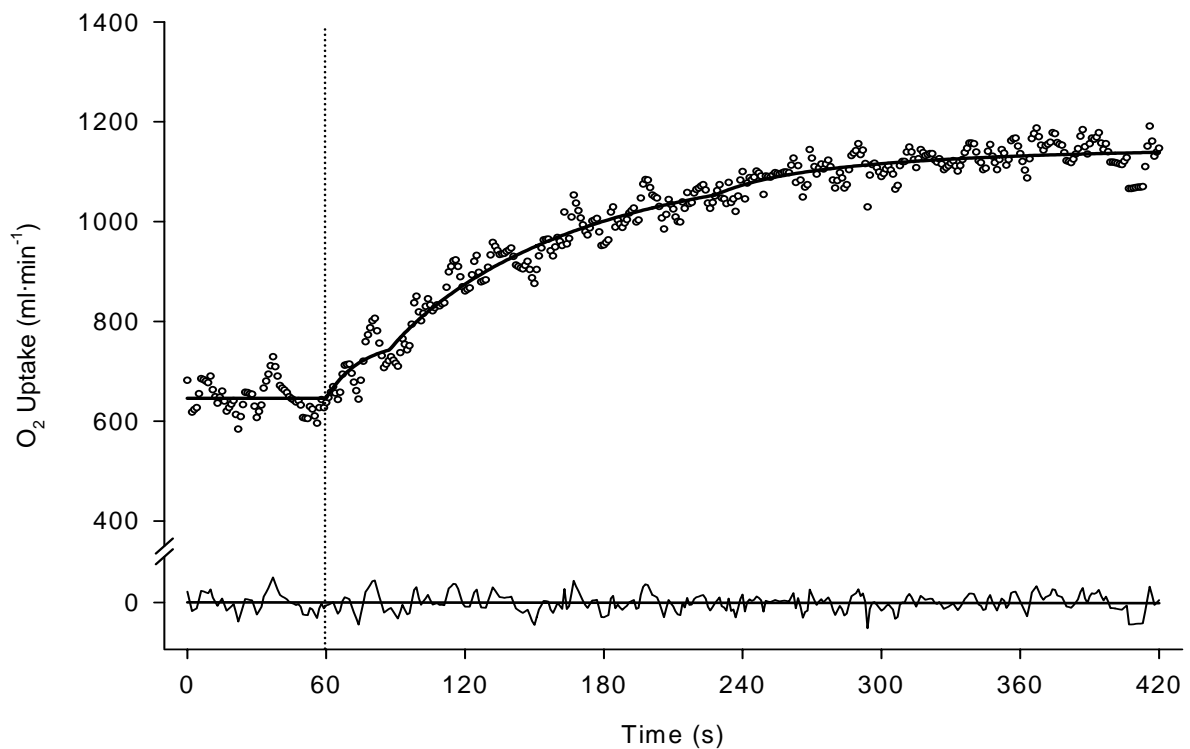

Figure 1.  $\dot{V}_{O_2}$  response to constant-load exercise in a representative subject. Data points represent mean second-by-second values for 2 transitions to 70% of peak power. The solid line indicates the model fit, with the residuals shown at the bottom. The pre-determined workload was applied at 60 s. The  $\dot{V}_{O_2}$  values from 0 to 60 s are for unloaded cycling.

Table 1: Oxygen uptake kinetics in the transition to constant-load exercise performed at 70% of peak power in patients with moderate COPD.

| Subjects             | $A_B$<br>(ml/min) | $A_C$<br>(ml/min) | $A_P$<br>(ml/min) | $A_S$<br>(ml/min) | $\tau_P$<br>(s) | $TD_P$<br>(s) | $TD_S$<br>(s)   |
|----------------------|-------------------|-------------------|-------------------|-------------------|-----------------|---------------|-----------------|
| 1                    | 555               | 24                | 310               | 59                | 86              | 9             | 217             |
| 2                    | 580               | 53                | 324               | 55                | 64              | 25            | 224             |
| 3                    | 477               | 19                | 146               | --                | 97              | 32            | --              |
| 4                    | 646               | 115               | 361               | 24                | 85              | 27            | 141             |
| 5                    | 551               | 47                | 352               | 26                | 74              | 26            | 229             |
| 6                    | 714               | 127               | 581               | --                | 115             | 22            | --              |
| 7                    | 747               | 158               | 663               | 80                | 55              | 8             | 174             |
| <b>Mean<br/>(SE)</b> | <b>610 (37)</b>   | <b>78 (21)</b>    | <b>391 (66)</b>   | <b>49 (11)</b>    | <b>82 (8)</b>   | <b>21 (3)</b> | <b>197 (17)</b> |

$A_B$ : baseline oxygen uptake amplitude;  $A_C$ : phase I amplitude;  $A_P$ : phase II amplitude;  $A_S$ : slow component amplitude;  $\tau_P$ : phase II time constant;  $TD_P$ : phase II onset time;  $TD_S$ : slow component onset time.

### The effect of $\dot{V}_{O_2}$ kinetics on the intermittent exercise response

To determine if the lower  $\dot{V}_{O_2}$  response observed during IE compared to CE was primarily the result of the exponential shape of the on-kinetic response, we used a similar methodology to that recently described by Morris and colleagues.<sup>1</sup> Briefly, we calculated the  $\dot{V}_{O_2}$  amplitude at 60 s of CE and compared this value with the measured IE response (Table 2). The  $\dot{V}_{O_2}$  amplitude for IE was determined as the average  $\dot{V}_{O_2}$  measured during the final 10 s of each 60-s exercise interval over the duration of the entire IE bout. The predicted  $\dot{V}_{O_2}$  value was calculated using a single exponential term, omitting the Phase I response (Equation 3):

$$\dot{V}_{O_2}(t) = A_B + A_P(1 - e^{-(t-TD_P)/\tau_P})$$

The  $\dot{V}_{O_2}$  amplitude at 60 s was also re-calculated using a time constant ( $\tau_P$ ) value of 42 s. This value is the mean phase II  $\tau$  for healthy older individuals performing constant-load cycling at ~70% of peak power.<sup>2</sup>

Table 2. Measured and predicted oxygen uptake values for intermittent exercise.

| Subjects         | Measured $\dot{V}_{O_2}$<br>(l/min) | Predicted $\dot{V}_{O_2}$ | Predicted $\dot{V}_{O_2}$ |
|------------------|-------------------------------------|---------------------------|---------------------------|
|                  |                                     | (l/min)                   | (l/min)                   |
|                  |                                     | $\tau_P$ from Table 1     | $\tau_P = 42$ s           |
| 1                | 0.76                                | 0.72                      | 0.81                      |
| 2                | 0.78                                | 0.79                      | 0.87                      |
| 3                | 0.88                                | 0.89                      | 1.01                      |
| 4                | 0.77                                | 0.75                      | 0.85                      |
| 5                | 1.05                                | 1.29                      | 1.37                      |
| 6                | 0.97                                | 1.00                      | 1.25                      |
| 7                | 0.50                                | 0.54                      | 0.60                      |
| <b>Mean (SE)</b> | <b>0.82 (0.07)</b>                  | <b>0.85 (0.09)</b>        | <b>0.97 (0.10)*</b>       |

$\dot{V}_{O_2}$ : oxygen uptake;  $\tau_P$ : phase II time constant. The measured  $\dot{V}_{O_2}$  values represent the mean end-exercise interval values obtained over the entire intermittent exercise test duration. The predicted  $\dot{V}_{O_2}$  values were calculated using a single-term (Equation 3) exponential model (see text for details). \* P<0.05, significantly different from measured  $\dot{V}_{O_2}$  value (repeated measures ANOVA).

## REFERENCES

- 1 **Morris N**, Gass G, Thompson M, *et al.* Physiological responses to intermittent and continuous exercise at the same relative intensity in older men. *Eur J Appl Physiol* 2003;**90**:620-625.
- 2 **Sabapathy S**, Schneider DA, Comadira G, *et al.* Oxygen uptake kinetics during severe exercise: a comparison between young and older men. *Respir Physiol Neurobiol* 2004;**139**:203-213.
